# Modeling Biases in SARS-CoV-2 infections Prediction using Genome Copies Concentration in Wastewater

Mattia Mattei<sup>1,\*</sup>, Rosa M. Pinto<sup>2</sup>, Susana Guix<sup>2</sup>, Albert Bosch<sup>2</sup>, and Alex Arenas<sup>1,3,\*</sup>

<sup>1</sup>Departament d'Enginyeria Informàtica i Matemàtiques, Universitat Rovira i Virgili, 43007 Tarragona, Spain

<sup>2</sup>Enteric Virus Laboratory, School of Biology, University of Barcelona, 08028, Barcelona, Spain

<sup>3</sup>Pacific Northwest National Laboratory, 902 Battelle Blvd, Richland, WA, 99354, USA

\*Corresponding authors: [mattia.mattei@urv.cat](mailto:mattia.mattei@urv.cat), [alexandre.arenas@urv.cat](mailto:alexandre.arenas@urv.cat)

March 6, 2023

## Abstract

**Background:** SARS-CoV-2, the virus responsible for the COVID-19 pandemic, can be detected in stool samples and subsequently shed in the sewage system. The field of Wastewater-based epidemiology (WBE) aims to use this valuable source of data for epidemiological surveillance, as it has the potential to identify unreported infections and to anticipate the need for diagnostic tests.

**Objectives:** The objectives of this study were to analyze the absolute concentration of genome copies of SARS-CoV-2 shed in Catalonia's wastewater during the Omicron peak in January 2022, and to develop a mathematical model capable of using wastewater data to estimate the actual number of infections and the temporal relationship between reported and unreported infections.

**Methods:** We collected twenty-four-hour composite 1-liter samples of wastewater from 16 wastewater treatment plants (WWTPs) in Catalonia on a weekly basis. We incorporated this data into a compartmental epidemiological model that distinguishes between reported and unreported infections and uses a convolution process to estimate the genome copies shed in sewage.

**Results:** The 16 WWTPs showed an average correlation of  $0.88 \pm 0.08$  (ranging from 0.96 to 0.71) and an average delay of  $8.7 \pm 5.4$  days (ranging from 0 to 20 days). Our model estimates that about 53% of the population in our study had been infected during the period under investigation, compared to the 19% of cases that were detected. This under-reporting was especially high between November and December 2021, with values up to 10. Our model also allowed us to estimate the maximum quantity of genome copies shed in a gram of feces by an infected individual, which ranged from  $4.15 \times 10^7$  gc/g to  $1.33 \times 10^8$  gc/g.

**Discussion:** Although wastewater data can be affected by uncertainties and may be subject to fluctuations, it can provide useful insights into the current trend of an epidemic. As a complementary tool, WBE can help account for unreported infections and anticipate the need for diagnostic tests, particularly when testing rates are affected by human behavior-related biases.

## 1 Introduction

The emergence of the SARS-CoV-2 coronavirus in 2019 has resulted in a global pandemic, which has led to over 600 million infections and 6 million deaths worldwide. Epidemiological data has played a crucial role in monitoring the spread of the epidemic, with clinical testing via reverse transcription quantitative polymerase chain reaction (Rt-qPCR) on nasopharyngeal swabs being the primary method. However, limitations and biases exist in any epidemiological indicator, particularly in the case of PCR testing, which relies on voluntary participation and may only capture individuals more likely to be infected. Given the high number of asymptomatic and subclinical infections, this biased testing process can significantly impact estimations. Although hospitalizations and deaths are less susceptible to bias, they may not be ideal for real-time forecasting due to their lagged estimations.

Wastewater-based epidemiology (WBE), i.e. the surveillance of epidemic spreading through the analysis of virus concentration in wastewater plants, is therefore presenting itself as a potential complementary tool to clinical testing, and it is gaining more and more attention among the mathematical modellers. The concept of WBE centers around the knowledge that SARS-CoV-2 RNA can be detected in stool samples excreted by human bodies [1, 2] and then shed in the sewage system. Therefore, daily sampling of SARS-CoV 2 RNA in wastewater would provide information similar to that from daily random testing of

41 thousands of individuals in a community [4], but not distinguishing between symptomatic, asymptomatic  
42 or presymptomatic people as long as they develop viral RNA in their feces. The interest of the WBE  
43 relies on two main aspects: wastewater data can potentially account the unreported cases, and they  
44 can also represent an estimate in advanced over time respect to diagnostic tests. Consequently, WBE is  
45 envisaged to become the most important non-invasive diagnostic tool of the epidemics in a population.

46  
47 The concept of wastewater epidemiology has frequently been referred to as a "leading indicator" of  
48 reported cases [5], although there is often a time delay between the two measures [6–9]. The extent of  
49 the lead time provided by sewage data varies significantly in the literature, ranging from a few days to  
50 up to two weeks [10]. The duration of the time delay between wastewater estimates and reported cases  
51 is influenced by various factors, including the characteristics of the health system such as the availability  
52 and distribution of diagnostic tests, and the time required to obtain test results [5]. However, it is  
53 important to note that wastewater estimates are subject to considerable uncertainty, which is attributable  
54 to several factors. Firstly, our understanding of the shedding process is limited. As detailed in section 2.2,  
55 the quantity of SARS-CoV-2 shed in feces and its temporal profile exhibit considerable inter-individual  
56 variability, and clinical studies have reported a wide range of results. Moreover, it remains unclear  
57 whether the onset of viral shedding in feces precedes or coincides with the onset of symptoms, given that  
58 most existing clinical studies have been conducted in hospitalized patients.

59 Secondly, the virus within the sewage system is subject to various "random" factors, such as dilution  
60 with the daily water flow, temperature, possible interactions with chemical agents or other substances,  
61 and environmental factors like rain. The features of the sewage systems, such as the travel time from  
62 households to treatment plants, can also have a significant impact on measurements. Lastly, the experi-  
63 mental process for extracting data on genetic copy concentration from sewage is not without challenges,  
64 and measurement errors should always be taken into consideration.

65 Upon considering the previous explanations, a fundamental question arises as to how to mathemat-  
66 ically quantify the biases between the genome copies concentration in wastewater, the reported cases,  
67 and the actual incidence in any given area. To this end, we conducted an analysis of data pertaining  
68 to the absolute concentrations of the SARS-CoV-2 gene biomarker N1 in weekly wastewater samples  
69 collected from 16 wastewater treatment plants (WWTP) in Catalonia, Spain, during the period span-  
70 ning October 2021 to March 2022. The data was sourced from the Catalan Surveillance Network of  
71 SARS-CoV-2 in Sewage (<https://sarsaigua.icra.cat/>). Initially, we examined the time delay and  
72 statistical correlation between wastewater data and reported cases at each WWTP. The data pertain-  
73 ing to reported cases was obtained from the official website of the Catalonia government (Generalitat  
74 de Catalunya <https://analisi.transparenciacatalunya.cat/browse?q=covid&sortBy=relevance>).  
75 Subsequently, we proposed a model that incorporates a time-varying rate of unreported cases to explain  
76 the observed delays and, in general, the heterogeneity of outcomes reported in the literature on the  
77 subject.

78 The principal outcomes of our study are twofold: Firstly, our analysis of wastewater data in the  
79 Catalonia region reveals a markedly high correlation with reported cases, with a mean Pearson correlation  
80 of 0.9, and an average 9-day advance in anticipating trends in reported cases, but with variability ranging  
81 from 0 to 20 days. Secondly, the proposed model enables us to successfully link wastewater data with  
82 temporal dynamics of the reported cases during the same period, and provides estimates of the actual  
83 prevalence of infection and parameters of interest in the context of wastewater-based epidemiology.

## 84 2 Methods

### 85 2.1 Wastewater sampling

86 The study involved the weekly collection of 1-liter composite samples of influent wastewater from 16  
87 wastewater treatment plants (WWTPs) (Table 1) in the region of Catalonia, Spain. The samples were  
88 collected over a period of six months, from October 2021 to March 2022. The WWTPs selected covered  
89 a population of approximately 2,514,618 inhabitants, which represents around 31% of the total Catalan  
90 population. The samples were transported in a portable icebox at a temperature range of 0°-4°C and  
91 were analyzed the day after concentration. The wastewater samples were collected within the framework  
92 of the Catalan Surveillance Network of SARS-CoV-2 in Sewage (<https://sarsaigua.icra.cat/>; <http://doi.org/10.5281/zenodo.4147073>).  
93

## 94 2.2 Wastewater concentration

95 Wastewater samples were concentrated by using the aluminum hydroxide adsorption-precipitation method,  
96 as described in previous studies (Randazzo et al., 2020 [11]; Wallis-Melnick, 1967 [12]). Two hundred  
97 milliliters of wastewater were concentrated to a final volume of 1-5 milliliters of phosphate-buffered saline  
98 (PBS). To ensure the accuracy of the concentration process,  $1.5 \times 10^6$  TCID50 units of the attenuated  
99 PUR46-MAD strain of the Transmissible Gastroenteritis Enteric Virus (TGEV) (Moreno et al., 2008 [13])  
100 were seeded into each sample prior to the concentration step.

## 101 2.3 Nucleic acid extraction

102 To extract nucleic acids, 300  $\mu$ l of the concentrated samples were used and the Maxwell<sup>®</sup> RSC PureFood  
103 GMO and Authentication Kit (Promega) was employed following the manufacturer’s instructions. In each  
104 extraction run, a PBS negative control was included. To determine virus recovery, a previously described  
105 RTqPCR assay for quantification of the Transmissible Gastroenteritis Enteric Virus (TGEV) was used  
106 (Vemulapalli and GulaniSantrich, 2009 [14]). Samples with virus recovery  $\geq 1\%$  were deemed acceptable.  
107 Recoveries varied from 1% to 98% with an average of  $24\% \pm 18\%$ .

## 108 2.4 RTqPCR assays

109 Quantification of SARS-CoV-2 RNA in sewage samples was based on the N1 assay (US-CDC 2020), which  
110 targets a fragment of the nucleocapsid gene. We employed the PrimeScript<sup>™</sup> One Step RT-PCR Kit  
111 (Takara Bio, USA) and a CFX96 BioRad instrument.

## 112 2.5 Convolution description of viral shedding

113 Convolution operations represent the most appropriate approach to mathematically model the relation-  
114 ships between genome copy concentration, reported cases, and actual infection prevalence. Convolution  
115 is a mathematical method that involves the combination of two functions to produce a third function that  
116 describes how one function modifies the other. The resulting function is defined as the convolution of the  
117 two input functions. In essence, the procedure involves sliding one function over the other, multiplying  
118 the overlapping portions of the two functions, and integrating the product over the entire variable range  
119 to generate a novel function that portrays the interplay between the two functions.

120 The virus concentration in sewage can be modeled as a function of the number of infected individuals  
121 in the serviced area and the time since they became infected, given a specific profile of the quantity of  
122 virus shed in feces over time.

123 There is a general consensus in the scientific literature on certain characteristics of the virus shedding  
124 profile: long duration, exponential decay, and peak around symptom onset. Wu et al. [15] reported  
125 that SARS-CoV-2 RNA can be detected in feces for a mean of 11.2 days after respiratory tract samples  
126 test negative (up to 5 weeks); Zhang et al. [16] found a median fecal shedding duration of 22 days.  
127 Wolfel et al. [1] observed RNA-positive stool samples for over 3 weeks without symptoms, with peak  
128 viral RNA likely occurring during the first week of symptoms. The timing of shedding onset relative  
129 to symptom onset remains debated due to lack of clinical data on exposed individuals, but Hoffman et  
130 al. [17] constrained the latter part of the shedding profile with a fast exponential decay. Miura et al. [18]  
131 successfully tested the model proposed by Teunis et al. [19] for norovirus shedding, to SARS-CoV-2  
132 clinical data, which accounts for both exponential rise and decay.

133 Wrapping up, a description that accurately captures the essential characteristics of the viral shedding  
134 profile is a gamma distribution, as reported in previous studies such as Huisman et al. [20] and Fernandez-  
135 Cassi et al. [21]. Specifically, Huisman et al. [20] used data on the incubation period and gastrointestinal  
136 shedding following symptoms onset to model the shedding profile as a gamma distribution with a mean  
137 of 6.7 days and a standard deviation of 7 days. We adopted this approach in our analysis.

138 Therefore, we modeled the quantity of genome copies at day  $t$  as

$$CG(t) = \bar{k} \sum_{t'=t-30}^{t'=t} \Gamma(t-t') N_I(t'), \quad (1)$$

139 where the number of new infections at time  $t'$ ,  $N_I(t')$ , is convoluted with the gamma distribution described  
140 above, truncated at 30 days, which tell us the quantity of genome copies per gram of feces shed at  $t-t'$   
141 days after the infection. The factor  $\bar{k}$  is a scale parameter and it should take in account several aspects:  
142 the degradation,  $D$  (defined between 0 and 1), that the shed virus may undergoes in his way to the plant

143 (this is affected by multiple factors like water temperature, dilution, chemical reactions as well as by the  
144 time the virus spends in it), the average grams of feces produced per person  $g$ , the fraction of infected  
145 people shedding virus in feces  $p$  and the total quantity of virus shed in a gram of feces by an individual  
146 during the entire course of the infection  $Q$ . Therefore, similarly as in Ahmed et al. [22], we can write

$$\bar{k} = Q \times p \times g \times D. \quad (2)$$

147 Following Chavarria-Miró et al. [23] the quantity  $g$  can be taken equal to 380 grams per day, based on an  
148 excretion of 30  $g$  per 5.5  $kg$  of body weight, assuming an average weight of Spanish population of 70  $kg$   
149 (<https://www.mscbs.gob.es/estadEstudios/sanidadDatos/>). The value for the fraction of infected  
150 people shedding virus in feces  $p$ , is quite variable in the literature, ranging from the 29% of Wang et  
151 al. [2] to the 83.3 % of the patients for Zhang et al. [16]. The review on the topic by Cheung et al. [24]  
152 suggests to consider a value equal to the 48.1%.

153 The value of  $Q$  is also uncertain. Several studies [1] [24] [25] [26] agree that the maximum possible  
154 shed quantity of genome copies per milliliter of stool should be around  $Q_{\max} = 10^7$  gc/ml; Zhang et  
155 al. [16] indicates one order of magnitude less ( $Q_{\max} = 10^{5.8}$  gc/ml) while Arts et al. [27] proposed a value  
156 around  $Q_{\max} = 10^9$  gc/g. The dissipation process is also quite difficult to describe as affected by random  
157 factors and, in principle, it could change in time. McMahan et al. [25] proposed to use an exponential  
158 decay model which considers the effects of the water temperature and of the holding time on the virus.  
159 As stated by Weidhaas et al. [28], reported decay rates for SARS-CoV and surrogate coronaviruses in  
160 unpasteurized wastewater at 23 °C range from 0.02 to 0.143 per hour.

## 161 2.6 Compartmental model with a time-varying rate of reported infections

162 Compartmental models, specifically ordinary differential equation (ODE) models, have been the corner-  
163 stone of infectious disease modeling for over a century. These models divide the population into different  
164 compartments based on their infectious status, such as susceptible, infected, and recovered in the classical  
165 SIR model [29]. The movements of individuals between compartments are described by transition rates,  
166 which are based on the underlying biology of the disease, as well as demographic and behavioral factors.  
167 By simulating these transitions, compartmental models can be used to predict the future course of an  
168 outbreak and to evaluate the impact of different intervention strategies (Arenas et al. [30]).

169 In this study, we propose a variation of the Susceptible-Infected-Recovered (SIR) model, where infected  
170 individuals are divided into those who are infected but not detected ( $I_N$ ) and those who are detected and  
171 isolated ( $I_D$ ). The model is described by a system of differential equations, where the transmission rate  
172 of the disease is represented by  $\beta$ , the recovery rate by  $\gamma$ , and the total population by  $N$ :

$$\frac{dS(t)}{dt} = -\frac{\beta S(t)I_N(t)}{N}, \quad (3)$$

$$\frac{dI_N(t)}{dt} = \frac{\beta S(t)I_N(t)}{N} - \gamma I_N(t) - p(t)I_N(t), \quad (4)$$

$$\frac{dI_D(t)}{dt} = p(t)I_N(t) - I_D(t), \quad (5)$$

$$\frac{dR(t)}{dt} = \gamma I_N(t) + I_D(t). \quad (6)$$

173 Note that we have included in the model a time-dependent probability of infected individuals being  
174 detected, represented by  $p(t)$ , which is proportional to the ratio of the detected infections at time  $t$ :

$$p(t) = p_0 + (1 - p_0) \left( \frac{I_D(t)}{I_N(t) + I_D(t)} \right), \quad (7)$$

175 where, in case of zero detection,  $p(t) = p_0$ . This equation consists of a constant part and a time-  
176 dependent one: at each time step there is a constant percentage  $p_0$  of infected that decide to get tested  
177 *unconditionally* while the rest is more sensible to the available information about the actual state of the  
178 epidemics.

179 This probability is influenced by factors such as changes in testing availability, policy, and implemen-  
180 tation of Non-Pharmaceutical-Interventions (NPIs), as well as the general perception of the population  
181 about the ongoing epidemic. We assume that infected individuals, once detected, are automatically  
182 removed from the infected but not detected compartment. Moreover, we argue that  $p(t)$  is also funda-  
183 mentally related to the general perception that the population has about the on-going epidemic, especially

184 when the testing process is subministered on voluntary basis: people can be more or less willing to be  
185 tested according to their risk awareness or according to costs/benefits considerations, which clearly de-  
186 pend on the state of the epidemic, or better, on its *perceived* state; all the information that people have  
187 about the epidemic are enclosed in the daily reported cases. Given this and taking inspiration by several  
188 works which tried to model risk perception ([31], [32]).

189 Our idea is to validate this model using both wastewater data and reported cases information. The  
190 former can be generated at each time step according to equation 1, with daily new infections estimated  
191 by the system of equations above.

192 We argue that our model has the potential to provide insights into parameters of interest, such as  $\bar{k}$   
193 and  $p(t)$ , which can justify the spectrum of delays observed between wastewater data and reported cases.  
194 This theoretical framework can provide valuable information about the dynamics of infectious diseases  
195 and can inform public health policy and decision-making.

## 196 3 Results

### 197 3.1 Statistical description

198 We calculated the Pearson correlation between the number of genome copies in each wastewater treatment  
199 plant (WWTP) and the 7-day averaged number of reported COVID-19 cases for each specific plant. The  
200 reported cases were shifted back from 0 to 20 days to quantify the delay between sewage data and reported  
201 cases. We analyzed the period between October 2021 and March 2022, during which the Omicron variant  
202 was spreading rapidly in Catalonia and other parts of the world. The results, summarized in Table 1 and  
203 Figure 1, showed an average correlation of  $0.88 \pm 0.08$  ( $0.96-0.71$ ) and an average delay of  $8.7 \pm 5.4$  (0-20)  
204 days across the 16 WWTPs.

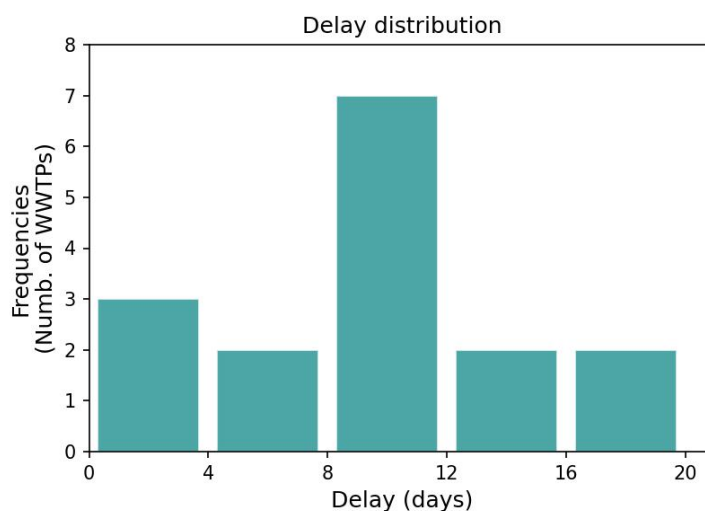

Figure 1: Distribution of the delays between wastewater data and reported cases curve across the 16 WWTPs analyzed.

205 These findings suggest that wastewater data can broadly capture the current trend of the epidemic,  
206 or at least to the extent that reported cases do. Furthermore, they seem to anticipate voluntary testing  
207 by a relevant quantity of days, more than reported in other studies. The observed delay was highly  
208 heterogeneous, ranging from 0 to 20 days, with extreme values occurring in the case of lower correlations.

209 Figure 2 compares the genome copies per liter averaged on all the 16 WWTPs versus the cases  
210 reported for the entire Catalonia, both normalized according to a population of 100,000 inhabitants. In  
211 this global perspective, the time-shift between the two curves is 10 days, with a correlation of 0.95. The  
212 model will provide plausible arguments to realistically explain a delay higher than expected, considering  
213 the available information about incubation period, fecal shedding, infection duration, and in general, to  
214 justify the wide range of observations in the literature.

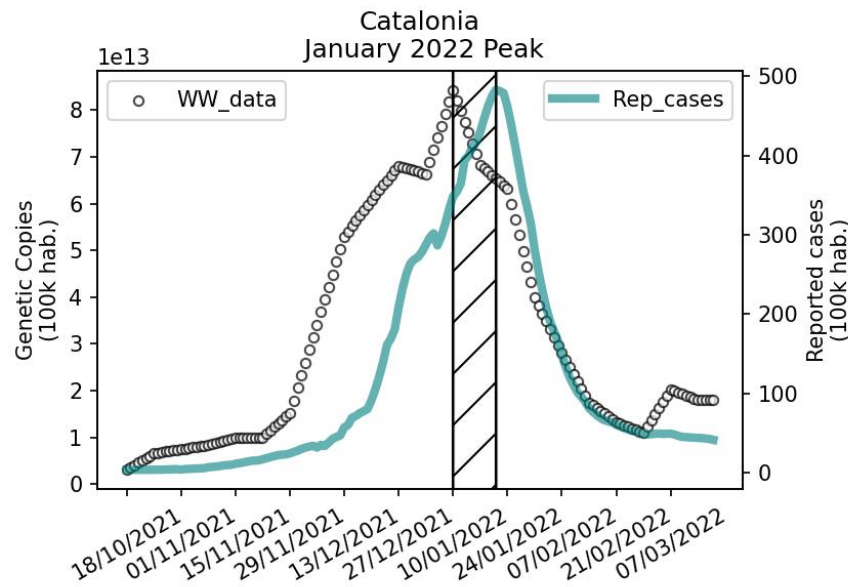

Figure 2: Absolute genome copies concentration averaged for all the WWTPs versus reported cases for the entire Catalonia.

### 215 3.2 Model calibration and validation

216 The model has been calibrated with real data of reported cases and genome copies concentration, averaged  
 217 across all the 16 plants and normalized to 100.000 inhabitants, using Approximate Bayesian Computation  
 218 (ABC) [33]. For a total time period of 152 days, we trained the model with the first 100 days and then  
 219 we validated it for the remaining ones. The procedure converged yielding the posterior distributions for  
 220 parameters  $\beta$ ,  $p_0$  and  $\bar{k}$  displayed in figure 3. The parameter  $\gamma$  has been chosen equal to  $10 \text{ days}^{-1}$ . All  
 221 the details about the parameters can be found in table 2.

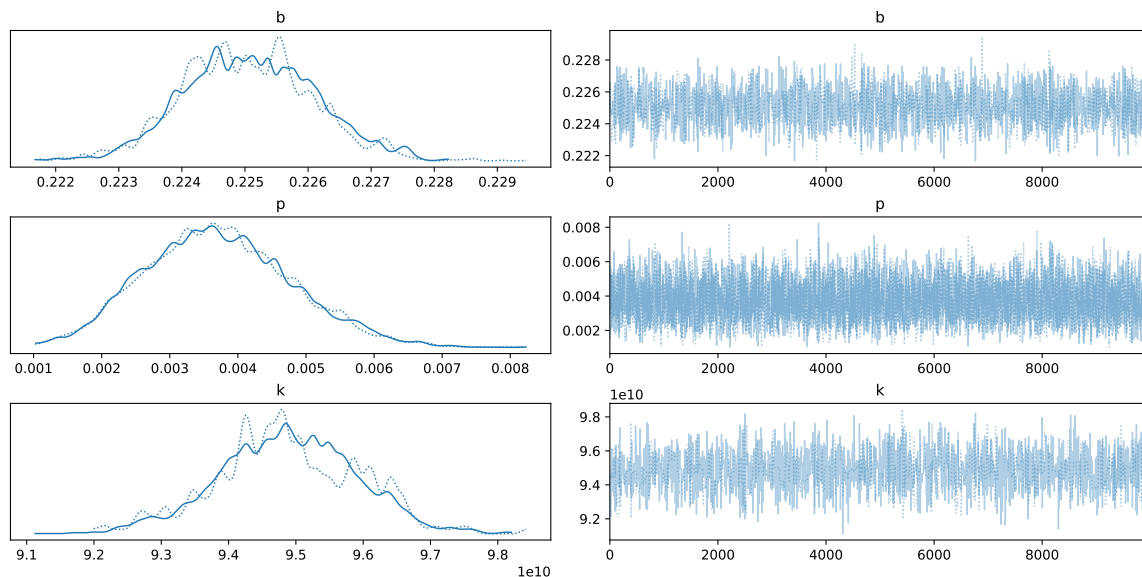

Figure 3: Posterior distributions provided by Approximate Bayesian Computation for parameters  $\beta$ ,  $p_0$  and  $\bar{k}$  (b, p and k respectively in the figure).

222 Afterwards, we ran the model using the average parameter values obtained from the calibration  
 223 process. The resulting epidemiological scenario is presented in Figure 4, which shows the proportions of  
 224 susceptible individuals ( $S$ ), undetected infected individuals ( $I_N$ ), detected infected individuals ( $I_D$ ), and  
 225 recovered individuals ( $R$ ).

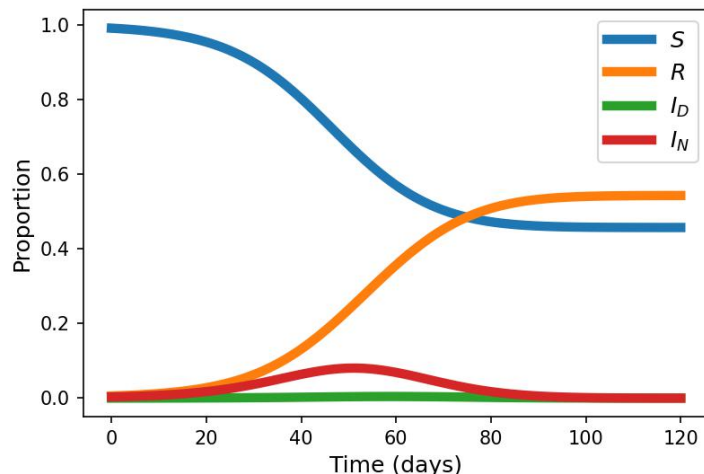

Figure 4: Proportions of the population being susceptible ( $S$ ), infected not detected ( $I_N$ ), infected detected ( $I_D$ ) and recovered ( $R$ ).

226 According to the model, approximately 53% of the population under study was infected during the  
 227 period analyzed. Figure 5 presents a comparison between the confirmed cases data, wastewater data,  
 228 and the model's predictions in the left and right panels, respectively. The  $R^2$  statistics for reported cases  
 229 and genome copies are 0.94 and 0.64, respectively.

230 The figures reveal a significant agreement in both qualitative and quantitative terms for all stages of  
 231 the epidemic wave, particularly in the case of reported cases. Sewage data, which are subject to notable  
 232 fluctuations, show a lesser degree of agreement.

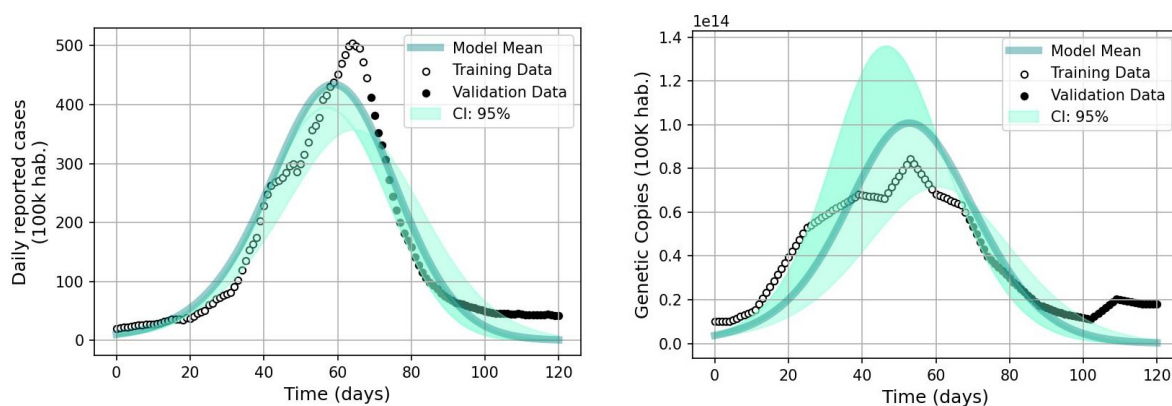

Figure 5: Model validation and spatiotemporal propagation of COVID-19 across Catalonia visualized through daily reported cases and absolute concentrations of genome copies in sewage.

### 233 3.3 Detection rate and under-reporting

234 Our study indicates that the actual number of infections during the period of October 2021 to February  
 235 2022 in the analyzed areas of Catalonia was approximately three times higher than the reported cases.  
 236 However, during November to December 2021, this ratio reached values up to ten (left panel of figure 6).  
 237 As a result, the detection rate, which is represented by  $p(t)$  in the equations, appears to be a monotonically  
 238 increasing function over time (central panel in figure 6).

239 The model predicted that the daily genome copies would peak approximately five days before the  
 240 simulated detected infections, which is consistent with some findings in previous literature [6] [8]. This  
 241 suggests that the observed delays can be attributed to two factors: (i) fluctuations and noise in sewage  
 242 data, and (ii) the value of the parameter  $p_0$ , which is related to the initial value and variability of the  
 243 detection rate over time. The delay between simulated genome copies and reported cases was observed

244 to be a monotonically decreasing function with  $p_0$  in the equations, with values between 0.001 and 0.01  
 245 resulting in a wide range of delays (2 - 16 days), consistent with numerous available datasets (right panel  
 246 of figure 6).

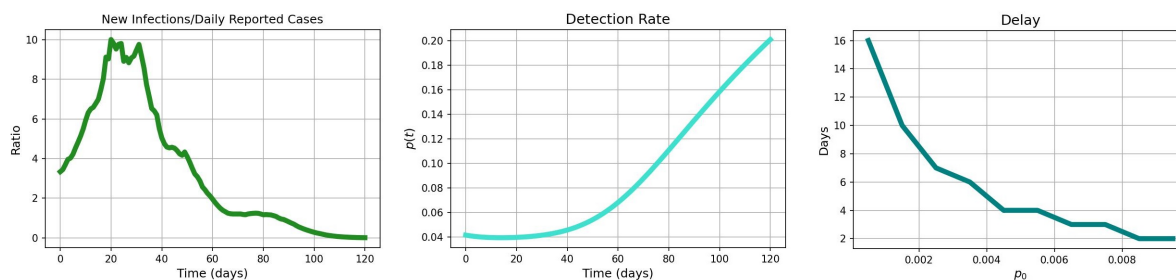

Figure 6: Temporal evolution for the ratio between simulated new infections and daily reported cases data (left panel) and for the transition probability  $p(t)$  (central panel). Delay between generated genome copies in sewage and detected infections versus the parameter  $p_0$ .

### 247 3.4 Maximum quantity of genome copies shed in feces by an individual

248 Our theoretical framework provides an estimate of the parameter  $\bar{k}$  (see Section 2.5) that relates the  
 249 viral load introduced into the system to that being measured. Using the deterministic equation 2, we  
 250 estimated  $Q_{max}$ , which represents the maximum quantity of genome copies shed in a gram of feces by  
 251 an individual during the course of infection. This quantity is of interest in the field of Wastewater-Based  
 252 Epidemiology (WBE) applied to SARS-CoV-2 but has large fluctuations in estimations available in the  
 253 literature.

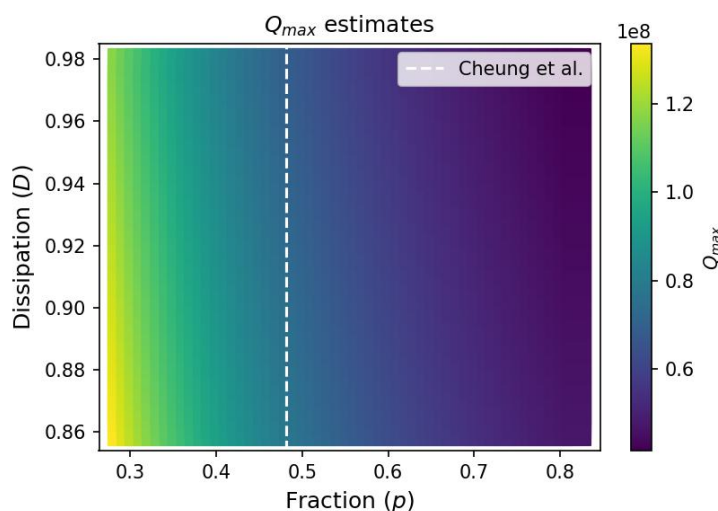

Figure 7: Values of  $Q_{max}$  varying the dissipation factor  $D$  and the fraction  $p$  and inferred by the estimated value for  $\bar{k}$ .

254 Figure 7 shows a colormap indicating the values of  $Q_{max}$  inferred from equation 2 using the mean  
 255 value of  $\bar{k}$  in the posterior distribution yielded by the model calibration procedure. We considered the  
 256 possible range of values for the dissipation factor  $D$  (0.86-0.98) and the fraction of people shedding virus  
 257 in feces  $p$  (0.29-0.83) as indicated in section 2.5. The results indicate a value of  $Q_{max}$  between  $4.15 \times 10^7$   
 258  $gc/g$  and  $1.33 \times 10^8 gc/g$ , which is in agreement with most of the indications from other studies.

## 259 4 Discussion

260 The aim of this study was to assess the potential of using wastewater-based epidemiology (WBE) to  
 261 anticipate reported cases and estimate the actual prevalence of SARS-CoV-2 infections. We have used real  
 262 data from Catalonia. The results showed that wastewater data displayed a high correlation with reported



263 cases, indicating that WBE can capture the current trend of the epidemic. On average, wastewater data  
264 anticipated reported cases by about 9-10 days, providing an early warning of an increase in cases.

265 We have also proposed a simple theoretical framework that integrated wastewater data into a com-  
266 partmental epidemic model. This framework enabled them to estimate the actual prevalence of infection,  
267 which was found to be about 53%, compared to the 19% detected in the same period in Catalonia. This  
268 discrepancy suggests that there was a large and time-variable under-reporting in the detection of infec-  
269 tions, especially at the onset of the epidemic. We argued that this under-reporting was fundamentally  
270 related to people's perception of the epidemic state and the information available to them, generating a  
271 vicious circle.

272 We have estimated the maximum quantity of genome copies shed in a gram of feces by an individual  
273 during the course of the infection, which results to be between  $4.15 \times 10^7$  gc/g and  $1.33 \times 10^8$  gc/g, which  
274 showed a good agreement with the literature.

275 We want also to remark few aspects that can limit our analysis. The main limitation is represented by  
276 the data itself: as pointed out by [20], with less than three samples per week the measurements of genome  
277 copies in sewage can change according to the day of the data taking. We are looking forward to improve  
278 our weekly data-set increasing the number of samples per week. In general, we are aware that a more  
279 complex model is needed to model SARS-CoV-2 epidemic involving other aspects like mobility, protection  
280 measures, restrictions, age stratification etc.. and, in particular, to express such intricate concept like  
281 the people perception and awareness about the epidemic. Indeed, other aspects of human behaviour can  
282 be taken in consideration, as imitation processes or adoption of different strategies, given that human  
283 behaviour and epidemic spreading undergo to a complex interaction that goes in both directions. We are  
284 also aware that mechanistic models that try to in-globe wastewater data cannot be extremely accurate,  
285 due to the intrinsic volatility and the multitude of factors that enter in the entire process of the virus  
286 shedding in the sewage system. For instance, Thomas et al. [34] highlighted how considering dynamical  
287 populations, for which the number of persons served by a specific sewage plant can change in time, is way  
288 more accurate than fixed ones. Morvan et al. [8] showed how machine learning models result naturally  
289 more accurate in capturing the wastewater phenomenology.

290 Nevertheless, we think that our work can hopefully highlight the importance of monitoring trends in  
291 wastewater data, being a crucial tool to estimate actual infections when voluntary testing policies results  
292 too biased. We hope that this work can be seen as a threefold contribution in the field of wastewater-  
293 based epidemiology, in the study of biases in data and as a retrospective study for the Covid-19 Omicron  
294 epidemic wave in Catalonia during January 2022.

## 295 Acknowledgments

296 This work was partially funded by the Catalan Agency for Water (ACA), the Catalan Public Health  
297 Agency (ASPCAT) from the Department of Health, and the Health Innovation Program from the General  
298 Research Directorate (DGRIS) of the Generalitat de Catalunya. The authors would like to thank the  
299 EU and The Spanish State Research Agency for funding project PCI2021-121928, in the frame of the  
300 collaborative international consortium SARA financed under the ERA-NET AquaticPollutants Joint  
301 Transnational Call (GA n<sup>a</sup>869178). We kindly acknowledge Promega for the assignment of a Maxwell  
302 AS4500 nucleic acids extraction System.

303 This project has received funding from the European Union's Horizon 2020 research and innovation  
304 program under the Marie Skłodowska-Curie grant agreement No. 945413 and from the Universitat Rovira  
305 i Virgili (URV). Disclaimer: This work reflects only the author's view and the Agency is not responsible  
306 for any use that may be made of the information it contains.

307 AA acknowledges the Joint Appointment Program at Pacific Northwest National Laboratory (PNNL).  
308 PNNL is a multi-program national laboratory operated for the U.S. Department of Energy (DOE) by  
309 Battelle Memorial Institute under Contract No. DE-AC05-76RL01830, the European Union's Horizon  
310 Europe Programme under the CREXDATA project, grant agreement no. 101092749, support by Min-  
311 isterio de Economía y Competitividad (Grants No. PID2021-128005NB-C21), Generalitat de Catalunya  
312 (Grant No. 2017SGR-896) and Universitat Rovira i Virgili (Grant No. 2019PFR-URV-B2-41). A.A. also  
313 acknowledges ICREA Academia 2023, and the James S. McDonnell Foundation (Grant No. 220020325).

## 314 Competing interests

315 The authors declare they have nothing to disclose.

## <sup>316</sup> **Authors contribution**

<sup>317</sup> M.M. and A.A. designed the study. R.P., S.G., and A.B. provided the data. M.M. analyzed the data and  
<sup>318</sup> performed the analysis. M.M. and A.A. analyzed the results and wrote the paper. All authors reviewed  
<sup>319</sup> and approved the complete manuscript.

## References

- [1] R. Wölfel, V.M. Corman, and W. Guggemos et al. Virological assessment of hospitalized patients with covid-2019. *Nature*, 581:465–469, 2020.
- [2] W. Wang, Y. Xu, R. Gao, R. Lu, K. Han, G. Wu, and W. Tan. Detection of sars-cov-2 in different types of clinical specimens. *JAMA*, 323(18):1843–1844, 2020.
- [3] Albert Carcereny et al. Dynamics of sars-cov-2 alpha (b.1.1.7) variant spread: The wastewater surveillance approach. *Environmental research*, 208:112720, 2022.
- [4] D.A. Larsen and K.R. Wigginton. Tracking covid-19 with wastewater. *Nat. Biotechnol*, 38:1151 – 1153, 2020.
- [5] SW Olesen, M Imakaev, and C. Duvallet. Making waves: Defining the lead time of wastewater-based epidemiology for covid-19. *Water Res.*, 202:117433, 2021.
- [6] J. Peccia, A. Zulli, and D.E. Brackney et al. Measurement of sars-cov-2 rna in wastewater tracks community infection dynamics. *Nat Biotechnol*, 38:1164–1167, 2020.
- [7] PM D’Aoust, TE Graber, and E Mercier et al. Catching a resurgence: Increase in sars-cov-2 viral rna identified in wastewater 48 h before covid-19 clinical tests and 96 h before hospitalizations. *Sci Total Environ.*, 770:145319, 2021.
- [8] M. Morvan, A.L. Jacomo, and C. et al. Souge. An analysis of 45 large-scale wastewater sites in england to estimate sars-cov-2 community prevalence. *Nat Commun*, 13:4313, 2022.
- [9] F. Wu, A. Xiao, and J. Zhang et al. Sars-cov-2 titers in wastewater foreshadow dynamics and clinical presentation of new covid-19 cases. *medRxiv*, 2020.
- [10] N. Krivoňáková, A. Šoltýsová, and M. Tamáš et al. Mathematical modeling based on rt-qpcr analysis of sars-cov-2 in wastewater as a tool for epidemiology. *Sci Rep*, 11:19456, 2021.
- [11] W. Randazzo, P. Truchado, E. Cuevas-Ferrando, P. Simon, A. Allende, and G. Sanchez. Sars-cov-2 rna in wastewater anticipated covid-19 occurrence in a low prevalence area. *Water Res*, 181(115942), 2020.
- [12] C. Wallis and J.L. Melnick. Concentration of viruses on aluminum and calcium salts. *Am. J. Epidemiol.*, 85:459–468, 1967.
- [13] J.L. Moreno, S. Zuniga, L. Enjuanes, and I. Sola. Identification of a coronavirus transcript enhancer. *J. Virol*, 82:3882–3893, 2008.
- [14] R. Vemulapalli, J. Gulani, and C. Santrich. A real-time taqman rt-pcr assay with an internal amplification control for rapid detection of transmissible gastroenteritis virus in swine fecal samples. *J. Virol Methods*, 162:231–235, 2009.
- [15] Yongjian Wu, Cheng Guo, Lantian Tang, Zhongsi Hong, Jianhui Zhou, Xin Dong, Huan Yin, Qiang Xiao, Yanping Tang, Xiujuan Qu, Liangjian Kuang, Xiaomin Fang, Nischay Mishra, Jiahai Lu, Hong Shan, Guanmin Jiang, and Xi Huang. Prolonged presence of sars-cov-2 viral rna in faecal samples. *The Lancet Gastroenterology & Hepatology*, 5(5):434–435, 2020.
- [16] Ning Zhang, Yuhuan Gong, Fanping Meng, Yuhai Bi, Penghui Yang, and Fusheng Wang. Virus shedding patterns in nasopharyngeal and fecal specimens of covid-19 patients. *medRxiv*, 2020.
- [17] Till Hoffmann and Justin Alsing. Faecal shedding models for sars-cov-2 rna amongst hospitalised patients and implications for wastewater-based epidemiology. *medRxiv*, 2021.
- [18] F. Miura, M. Kitajima, and R. Omori. Duration of sars-cov-2 viral shedding in faeces as a parameter for wastewater-based epidemiology: Re-analysis of patient data using a shedding dynamics model. *Sci Total Environ.*, 769:144549, 2021.
- [19] P.F. Teunis, F.H. Sukhrie, H. Vennema, J. Bogerman, M.F. Beersma, and M.P. Koopmans. Shedding of norovirus in symptomatic and asymptomatic infections. *Epidemiol Infect.*, 143(8):1710–1717, 2015.
- [20] Jana S. Huisman and J. Scire et al. Wastewater-based estimation of the effective reproductive number of sars-cov-2. *Environmental Health Perspective*, 150(15), 2022.

- [21] Xavier Fernandez-Cassi, Andreas Scheidegger, Carola Bänziger, Federica Cariti, Alex Tuñas Corzon, Pravin Ganesanandamoorthy, Joseph C. Lemaitre, Christoph Ort, Timothy R. Julian, and Tamar Kohn. Wastewater monitoring outperforms case numbers as a tool to track covid-19 incidence dynamics when test positivity rates are high. *Water Research*, 200:117252, 2021.
- [22] W. Ahmed, N. Angel, and J. et al. Edson. First confirmed detection of sars-cov-2 in untreated wastewater in australia: A proof of concept for the wastewater surveillance of covid-19 in the community. *Sci Total Environ.*, 728(138764), 2020.
- [23] G. Chavarria-Miró, E. Anfruns-Estrada, A. Martínez-Velázquez, M. Vázquez-Portero, S. Guix, M. Paraira, B. Galofré, G. Sánchez, RM Pintó, and A. Bosch. Time evolution of severe acute respiratory syndrome coronavirus 2 (sars-cov-2) in wastewater during the first pandemic wave of covid-19 in the metropolitan area of barcelona, spain. *Appl Environ Microbiol*, 87(7), 2021.
- [24] KS Cheung, IFN Hung, and PPY Chan et al. Gastrointestinal manifestations of sars-cov-2 infection and virus load in fecal samples from a hong kong cohort: Systematic review and meta-analysis. *Gastroenterology*, 159(1):81–95, 2020.
- [25] CS McMahan, S Self, and L Rennert et al. Covid-19 wastewater epidemiology: a model to estimate infected populations. *Lancet Planet Health*, 5(12):e874–e881, 2021.
- [26] Y. Xu, X. Li, and B. et al. Zhu. Characteristics of pediatric sars-cov-2 infection and potential evidence for persistent fecal viral shedding. *Nat Med*, 26(502-505), 2020.
- [27] P. Arts, B. Banman, K. Anglin, D. Kelly, A. Boehm, M. Wolfe, and K. Wigginton. Estimating sewershed prevalence of sars cov 2, pmmov, and crass phage fecal shedding using models informed by measurements from covid 19 patient samples and wastewater solids. *Virus outbreaks, epidemiology and source tracking, ISFEV 2022*, 2022.
- [28] J. Weidhaas, Z. T. Aanderud, D. K. Roper, J. VanDerslice, E. B. Gaddis, J. Ostermiller, K. Hoffman, R. Jamal, P. Heck, Y. Zhang, K. Torgersen, J. V. Laan, and N. LaCross. Correlation of sars-cov-2 rna in wastewater with covid-19 disease burden in sewersheds. *The Science of the total environment*, 775(145790), 2021.
- [29] WO Kermack and AG McKendrick. A contribution to the mathematical theory of epidemics. *Proceedings of the Royal Society of London. Series A, Containing Papers of a Mathematical and Physical Character*, 115(772):700–721, 1927.
- [30] Alex Arenas, Wesley Cota, Jesús Gómez-Gardeñes, Sergio Gómez, Clara Granell, Joan T. Matalas, David Soriano-Paños, and Benjamin Steinegger. Modeling the spatiotemporal epidemic spreading of covid-19 and the impact of mobility and social distancing interventions. *Phys. Rev. X*, 10:041055, Dec 2020.
- [31] Piero Poletti, Marco Ajelli, and Stefano Merler. The effect of risk perception on the 2009 h1n1 pandemic influenza dynamics. *PLOS ONE*, 6(2):1–7, 02 2011.
- [32] Benjamin Steinegger, Alex Arenas, Jesús Gómez-Gardeñes, and Clara Granell. Pulsating campaigns of human prophylaxis driven by risk perception palliate oscillations of direct contact transmitted diseases. *Phys. Rev. Res.*, 2:023181, May 2020.
- [33] Tina Toni, David Welch, Natalja Strelkova, Andreas Ipsen, and Michael P.H Stumpf. Approximate bayesian computation scheme for parameter inference and model selection in dynamical systems. *Journal of The Royal Society Interface*, 6(31):187–202, 2009.
- [34] K. V. Thomas, A. Amador, J.A. Baz-Lomba, and M. Reid. Use of mobile device data to better estimate dynamic population size for wastewater-based epidemiology. *Environmental science & technology*, 51(19):11363–11370, 2017.

## Tables

| WWTP                   | MAX CORR. | DELAY (days) |
|------------------------|-----------|--------------|
| LLAGOSTA_LA            | 0.96      | 8            |
| VILAFRANCA_DEL_PENEDÈS | 0.95      | 8            |
| MONTCADA               | 0.95      | 5            |
| GRANOLLERS             | 0.94      | 9            |
| RUBÍ                   | 0.94      | 10           |
| GIRONA                 | 0.94      | 9            |
| RIERA_DE_LA_BISBAL     | 0.92      | 8            |
| PUIGCERDÀ              | 0.91      | 4            |
| ABRERA                 | 0.91      | 3            |
| PRAT_DE_LLOBREGAT_EL   | 0.91      | 10           |
| SABADELL/RIU_SEC       | 0.89      | 2            |
| FIGUERES               | 0.86      | 12           |
| BANYOLES               | 0.83      | 20           |
| MONTORNÈS_DEL_VALLÈS   | 0.76      | 0            |
| MARTORELL              | 0.72      | 20           |
| BERGA                  | 0.71      | 12           |

Table 1: **The maximum Pearson correlations and the corresponding delays between sewage data and reported cases for each WWTP.**

For each of the 16 wastewater plants listed in the left column we measured the Pearson correlation between genome copies concentrations data linearly interpolated and 7-days averaged daily reported cases in the corresponding served municipalities. We performed the analysis shifting back in time reported cases from 0 to 20 days. We interpreted as *delay* the shift at which we reached maximum correlation.

| Symbol   | Description                       | Estimates                                                                      | Assignment |
|----------|-----------------------------------|--------------------------------------------------------------------------------|------------|
| $\beta$  | Infectivity                       | 0.225 (97% CI: 0.223 - 0.227)                                                  | Calibrated |
| $\gamma$ | Recovery rate                     | 10 days <sup>-1</sup>                                                          | Assumed    |
| $p_0$    | Initial testing rate              | 0.004 (97% CI: 0.001 - 0.006)                                                  | Calibrated |
| $k$      | Scale factor for shedding process | $9.49 \times 10^{10}$ (97% CI: $9.29 \times 10^{10}$ - $9.68 \times 10^{10}$ ) | Calibrated |

Table 2: **Parameters of the model**

The parameters were estimated using Approximate Bayesian Computation (ABC). Only the recovery rate  $\gamma$  was assumed to be equal to 10 days<sup>-1</sup>.

## Figure captions

- **Figure 1:** Histogram showing the distribution of the delays between wastewater data and reported cases curve across the 16 WWTPs considered. With *delay* we refer to the amount of days by which daily reported cases needed to be shifted back in time in order to obtain maximum Pearson correlation. This procedure results in a average correlation of  $0.88 \pm 0.08$  (0.71- 0.96) and an average delay of  $8.7 \pm 5.4$  days (0-20);
- **Figure 2:** Graphic showing the trends for absolute genome copies concentrations of SARS-CoV-2 averaged across the 16 WWTPs (dots, right y-axis) and for 7-days averaged reported cases in Catalonia (solid line, left y-axis). Both measures were calibrated to 100.000 inhabitants. The striped area indicates the temporal distance between the peaks of the two curves;
- **Figure 3:** The figure shows the results of the Approximate Bayesian Computation (ABC) procedure for the estimation of the parameters  $\beta$ ,  $p_0$  and  $\bar{k}$ , respectively indicated as  $b$ ,  $p$  and  $k$ . The plots on the left side are the posterior distributions whereas in the right side are showed all the values sampled during the process for all three parameters;
- **Figure 4:** The figure displays the temporal evolution of the simulated epidemic according to the model. The curves indicates the proportion of susceptible (S), infected not detected ( $I_N$ ), infected detected ( $I_D$ ) and recovered ( $R$ ) compartments;
- **Figure 5:** The figure shows the comparison between model predictions and data about daily reported cases (left side) and absolute genetic concentrations of SARS-CoV-2 in sewage. Solid lines show model predictions for the daily reported cases (left) and the daily number of genome copies in sewage (right) for 100 000 inhabitants, whereas dots correspond to real data. The model has been trained for the first 100 days data (white dots) and validate in the remaining ones (black dots). The shadowed areas represent the 95% prediction interval. The  $R^2$  statistics is 0.94 for cases and 0.64 for wastewater data;
- **Figure 6:** Left panel: temporal evolution of the ratio between new infections simulated by the model at each time step and daily reported cases data. Central panel: temporal evolution of the detection rate  $p(t)$  according to the model estimates. Right panel: days of delay between generated quantity of genome copies concentrations and detected infections varying the value of  $p_0$ . The former is deduced again looking to the maximum Pearson correlation between the two simulated data-sets of genome copies and detected infections;
- **Figure 7:** Colormap showing estimations for the maximum quantity of genome copies shed in feces by an individual  $Q_{max}$  inferred from equation 2, varying the dissipation factor ( $D$ ) and the fraction of people shedding virus in feces ( $p$ ), according to the indications in the literature. We used the mean value of  $\bar{k}$  in the posterior distribution yielded by the model calibration procedure. The white dashed line indicates the value for  $p$  suggested by Cheung et al. [24] in their review.
